# Supplementary material
Source: PubMed Central journal article supplement (PMC8224539)

|         |         |         |           |              |          |         |         |          |
|---------|---------|---------|-----------|--------------|----------|---------|---------|----------|
| ABL1    | CCND1   | EGFL7   | FUBP1     | INPP4B       | MSH2     | PIK3C3  | RECQL4  | SRSF2    |
| ACVR1   | CCND2   | EGFR    | FYN       | INPL1        | MSH3     | PIK3CA  | REL     | STAG2    |
| AGO2    | CCND3   | EIF1AX  | GATA1     | INSR         | MSH6     | PIK3CB  | RET     | STAT3    |
| AKT1    | CCNE1   | EIF4A2  | GATA2     | IRF4         | MSI1     | PIK3CD  | RFWD2   | STAT5A   |
| AKT2    | CD274   | EIF4E   | GATA3     | IRS1         | MSI2     | PIK3CG  | RHEB    | STAT5B   |
| AKT3    | CD276   | ELF3    | GLI1      | IRS2         | MST1     | PIK3R1  | RHOA    | STK11    |
| ALK     | CD79A   | EP300   | GNA11     | JAK1         | MST1R    | PIK3R2  | RICTOR  | STK19    |
| ALOX12B | CD79B   | EPAS1   | GNAQ      | JAK2         | MTOR     | PIK3R3  | RIT1    | STK40    |
| ANKRD11 | CDC42   | EPCAM   | GNAS      | JAK3         | MUTYH    | PIM1    | RNF43   | SUFU     |
| APC     | CDC73   | EPHA3   | GPS2      | JUN          | MYC      | PLCG2   | ROS1    | SUZ12    |
| AR      | CDH1    | EPHA5   | GREM1     | KDM5A        | MYCL1    | PLK2    | RPS6KA4 | SYK      |
| ARAF    | CDK12   | EPHA7   | GRIN2A    | KDM5C        | MYCN     | PMAIP1  | RPS6KB2 | TAP1     |
| ARID1A  | CDK4    | EPHB1   | GSK3B     | KDM6A        | MYD88    | PMS1    | RPTOR   | TAP2     |
| ARID1B  | CDK6    | ERBB2   | H3F3A     | KDR          | MYOD1    | PMS2    | RRAGC   | TBK3     |
| ARID2   | CDK8    | ERBB3   | H3F3B     | KEAP1        | NBN      | PNRC1   | RRAS    | TCEB1    |
| ARID5B  | CDKN1A  | ERBB4   | H3F3C     | KIT          | NCOA3    | POLD1   | RRAS2   | TCF3     |
| ASXL1   | CDKN1B  | ERCC2   | HGF       | KLF4         | NCOR1    | POLE    | RTEL1   | TCF7L2   |
| ASXL2   | CDKN2A  | ERCC3   | HIST1H1C  | KMT2A (MLL)  | NEGR1    | PPARG   | RUNX1   | TEK      |
| ATM     | CDKN2B  | ERCC4   | HIST1H2BD | KMT2B (MLL4) | NF1      | PPM1D   | RXRA    | TERT     |
| ATR     | CDKN2C  | ERCC5   | HIST1H3A  | KMT2C (MLL3) | NF2      | PPP2R1A | RYBP    | TET1     |
| ATRX    | CEBPA   | ERF     | HIST1H3B  | KMT2D (MLL2) | NFE2L2   | PPP4R2  | SDHA    | TET2     |
| AURKA   | CENPA   | ERG     | HIST1H3C  | KMT5A        | NFKBIA   | PPP6C   | SDHAF2  | TGFBR1   |
| AURKB   | CHEK1   | ERRF1   | HIST1H3D  | KNSTRN       | NKX2-1   | PRDM1   | SDHB    | TGFBR2   |
| AXIN1   | CHEK2   | ESR1    | HIST1H3E  | KRAS         | NKX3-1   | PRDM14  | SDHC    | TMEM127  |
| AXIN2   | CIC     | ETV1    | HIST1H3F  | LATS1        | NOTCH1   | PREX2   | SDHD    | TMPRSS2  |
| AXL     | CREBBP  | ETV6    | HIST1H3G  | LATS2        | NOTCH2   | PRKAR1A | SESN1   | TNFAIP3  |
| B2M     | CRKL    | EZH1    | HIST1H3H  | LMO1         | NOTCH3   | PRKCI   | SESN2   | TNFRSF14 |
| BABAM1  | CRLF2   | EZH2    | HIST1H3I  | LYN          | NOTCH4   | PRKD1   | SESN3   | TOP1     |
| BAP1    | CSDE1   | FAM123B | HIST1H3J  | MALT1        | NPM1     | PTCH1   | SETD2   | TP53     |
| BARD1   | CSF1R   | FAM175A | HIST2H3C  | MAP2K1       | NRAS     | PTEN    | SF3B1   | TP53BP1  |
| BBC3    | CSF3R   | FAM46C  | HIST2H3D  | MAP2K2       | NSD1     | PTP4A1  | SH2B3   | TP63     |
| BCL10   | CTCF    | FAM58A  | HIST3H3   | MAP2K4       | NTHL1    | PTPN11  | SH2D1A  | TRAF2    |
| BCL2    | CTLA4   | FANCA   | HLA-A     | MAP3K1       | NTRK1    | PTPRD   | SHOC2   | TRAF7    |
| BCL2L1  | CTNNB1  | FANCC   | HLA-B     | MAP3K13      | NTRK2    | PTPRS   | SHQ1    | TSC1     |
| BCL2L11 | CUL3    | FAT1    | HNF1A     | MAP3K14      | NTRK3    | PTPRT   | SLX4    | TSC2     |
| BCL6    | CXCR4   | FBXW7   | HOXB13    | MAPK1        | NUF2     | RAB35   | SMAD2   | TSHR     |
| BCOR    | CYLD    | FGF19   | HRAS      | MAPK3        | NUP93    | RAC1    | SMAD3   | U2AF1    |
| BIRC3   | CYSLTR2 | FGF3    | ICOSLG    | MAPKAP1      | PAK1     | RAC2    | SMAD4   | UPF1     |
| BLM     | DAXX    | FGF4    | ID3       | MAX          | PAK7     | RAD21   | SMARCA4 | VEGFA    |
| BMPR1A  | DCUN1D1 | FGFR1   | IDH1      | MCL1         | PALB2    | RAD50   | SMARCB1 | VHL      |
| BRAF    | DDR2    | FGFR2   | IDH2      | MDC1         | PARK2    | RAD51   | SMARCD1 | VTCN1    |
| BRCA1   | DICER1  | FGFR3   | IFNGR1    | MDM2         | PARP1    | RAD51C  | SMO     | WHSC1    |
| BRCA2   | DIS3    | FGFR4   | IGF1      | MDM4         | PAX5     | RAD51L1 | SMYD3   | WHSC1L1  |
| BRD4    | DNAJB1  | FH      | IGF1R     | MED12        | PBRM1    | RAD51L3 | SOC3    | WT1      |
| BRIP1   | DNMT1   | FLCN    | IGF2      | MEF2B        | PDCD1    | RAD52   | SOS1    | WWTR1    |
| BTK     | DNMT3A  | FLT1    | IKBKE     | MEN1         | PDCD1LG2 | RAD54L  | SOX17   | XIAP     |
| CALR    | DNMT3B  | FLT3    | IKZF1     | MET          | PDGFRA   | RAF1    | SOX2    | XPO1     |
| CARD11  | DOT1L   | FLT4    | IL10      | MGA          | PDGFRB   | RARA    | SOX9    | XRCC2    |
| CARM1   | DROSHA  | FOXA1   | IL7R      | MITF         | PDPK1    | RASA1   | SPEN    | YAP1     |
| CASP8   | DUSP4   | FOXL2   | INHHA     | MLH1         | PGR      | RB1     | SPOP    | YES1     |
| CBFB    | E2F3    | FOXO1   | INHBA     | MPL          | PHOX2B   | RBM10   | SPRED1  | ZFHX3    |
| CBL     | EED     | FOXP1   | INPP4A    | MRE11A       | PIK3C2G  | RECQL   | SRC     | ZRSR2    |

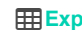

## 70 Intronic Regions

| Gene ID | Target      | Interval                 | Target ID        | Length | First Design |
|---------|-------------|--------------------------|------------------|--------|--------------|
| ALK     | intron_17   | chr2:29449941-29450438   | ALK_intron_17    | 498    | IMPACT-468   |
| ALK     | intron_18   | chr2:29448432-29449786   | ALK_intron_18    | 1355   | IMPACT-468   |
| ALK     | intron_19   | chr2:29446395-29448326   | ALK_intron_19    | 1932   | IMPACT-341   |
| BRAF    | intron_10   | chr7:140481494-140482820 | BRAF_intron_10   | 1327   | IMPACT-341   |
| BRAF    | intron_7    | chr7:140494268-140500161 | BRAF_intron_7    | 5894   | IMPACT-341   |
| BRAF    | intron_8    | chr7:140487385-140494107 | BRAF_intron_8    | 6723   | IMPACT-341   |
| BRAF    | intron_9    | chr7:140482958-140487347 | BRAF_intron_9    | 4390   | IMPACT-341   |
| CD74    | intron 4to6 | chr5:149784243-149785821 | CD74 intron 4to5 | 1579   | IMPACT-468   |

|              |              |                           |                    |       |            |
|--------------|--------------|---------------------------|--------------------|-------|------------|
| CD74         | intron_6     | chr5:149782876-149784242  | CD74_intron_6      | 1367  | IMPACT-410 |
| DNAJB1       | intron_1     | chr19:14627859-14628950   | DNAJB1_intron_1    | 1092  | IMPACT-410 |
| DNAJB1       | intron_2     | chr19:14626983-14627277   | DNAJB1_intron_2    | 295   | IMPACT-410 |
| EGFR         | intron_17    | chr7:55240818-55241613    | EGFR_intron_17     | 796   | IMPACT-468 |
| EGFR         | intron_24    | chr7:55268107-55268880    | EGFR_intron_24     | 774   | IMPACT-468 |
| EGFR         | intron_25    | chr7:55269049-55269427    | EGFR_intron_25     | 379   | IMPACT-468 |
| EGFR         | intron_26    | chr7:55269476-55270209    | EGFR_intron_26     | 734   | IMPACT-468 |
| EGFR         | intron_7     | chr7:55221846-55223521    | EGFR_intron_7      | 1676  | IMPACT-341 |
| ETV6         | intron_4     | chr12:12006496-12022357   | ETV6_intron_4      | 15862 | IMPACT-410 |
| ETV6         | intron_5     | chr12:12022904-12037378   | ETV6_intron_5      | 14475 | IMPACT-341 |
| EWSR1        | intron_7to13 | chr22:29683124-29694788   | EWSR1_intron_7to13 | 11665 | IMPACT-341 |
| FGFR2        | intron_16    | chr10:123243318-123244907 | FGFR2_intron_16    | 1590  | IMPACT-468 |
| FGFR2        | intron_17    | chr10:123239536-123243211 | FGFR2_intron_17    | 3676  | IMPACT-341 |
| FGFR3        | intron_15    | chr4:1807901-1807982      | FGFR3_intron_15    | 82    | IMPACT-468 |
| FGFR3        | intron_16    | chr4:1808055-1808271      | FGFR3_intron_16    | 217   | IMPACT-468 |
| FGFR3        | intron_17    | chr4:1808411-1808554      | FGFR3_intron_17    | 144   | IMPACT-468 |
| FGFR3        | intron_18    | chr4:1808662-1808842      | FGFR3_intron_18    | 181   | IMPACT-341 |
| MET          | intron_13    | chr7:116411709-116411902  | MET_intron_13      | 194   | IMPACT-468 |
| MET          | intron_14    | chr7:116412044-116414934  | MET_intron_14      | 2891  | IMPACT-468 |
| NAB2         | intron_2to6  | chr12:57485782-57489250   | NAB2_intron_2to6   | 3469  | IMPACT-410 |
| NTRK1        | intron_10    | chr1:156844419-156844697  | NTRK1_intron_10    | 279   | IMPACT-341 |
| NTRK1        | intron_11    | chr1:156844801-156845311  | NTRK1_intron_11    | 511   | IMPACT-410 |
| NTRK1        | intron_12    | chr1:156845459-156845871  | NTRK1_intron_12    | 413   | IMPACT-410 |
| NTRK1        | intron_3     | chr1:156834592-156836700  | NTRK1_intron_3     | 2109  | IMPACT-468 |
| NTRK1        | intron_7     | chr1:156841548-156843423  | NTRK1_intron_7     | 1876  | IMPACT-468 |
| NTRK1        | intron_8     | chr1:156843752-156844174  | NTRK1_intron_8     | 423   | IMPACT-341 |
| NTRK1        | intron_9     | chr1:156844193-156844362  | NTRK1_intron_9     | 170   | IMPACT-341 |
| NTRK2        | intron_15    | chr9:87476003-87482157    | NTRK2_intron_15    | 6155  | IMPACT-468 |
| NUT/C15orf55 | intron_1     | chr15:34638237-34640169   | NUT_intron_1       | 1933  | IMPACT-341 |
| PAX8         | intron_10    | chr2:113977756-113984731  | PAX8_intron_10     | 6976  | IMPACT-341 |
| PAX8         | intron_8     | chr2:113993081-113994177  | PAX8_intron_8      | 1097  | IMPACT-341 |
| PAX8         | intron_9     | chr2:113984834-113992970  | PAX8_intron_9      | 8137  | IMPACT-341 |
| RELA         | intron_1to2  | chr11:65429560-65430296   | RELA_intron_1to2   | 737   | IMPACT-468 |
| RET          | intron_10    | chr10:43609124-43609927   | RET_intron_10      | 804   | IMPACT-341 |
| RET          | intron_11    | chr10:43610185-43612031   | RET_intron_11      | 1847  | IMPACT-341 |
| RET          | intron_7     | chr10:43606914-43607545   | RET_intron_7       | 632   | IMPACT-468 |
| RET          | intron_8     | chr10:43607673-43608299   | RET_intron_8       | 627   | IMPACT-468 |
| RET          | intron_9     | chr10:43608412-43609003   | RET_intron_9       | 592   | IMPACT-341 |
| ROS1         | intron_31    | chr6:117650610-117658333  | ROS_intron_31      | 7724  | IMPACT-341 |
| ROS1         | intron_32    | chr6:117647578-117650491  | ROS_intron_32      | 2914  | IMPACT-341 |
| ROS1         | intron_33    | chr6:117645579-117647385  | ROS_intron_33      | 1807  | IMPACT-341 |
| ROS1         | intron_34    | chr6:117642558-117645494  | ROS_intron_34      | 2937  | IMPACT-341 |
| ROS1         | intron_35    | chr6:117641194-117642421  | ROS_intron_35      | 1228  | IMPACT-341 |
| ROS1         | intron_30    | chr6:117658504-117662297  | ROS1_intron_30     | 3794  | IMPACT-468 |
| TFE3         | intron_3     | chrX:48895968-48896630    | TFE3_intron_3      | 663   | IMPACT-468 |
| TFE3         | intron_4to5  | chrX:48891767-48895966    | TFE3_intron_4to5   | 4200  | IMPACT-410 |
| TMPRSS2      | intron_1     | chr21:42870117-42879876   | TMPRSS2_intron_1   | 9760  | IMPACT-341 |
| TMPRSS2      | intron_2     | chr21:42866506-42870045   | TMPRSS2_intron_2   | 3540  | IMPACT-341 |

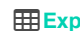

Supplement: NIHMS1712870-supplement-Table_S3.pdf [file NIHMS1712870-supplement-Table_S3.pdf]
