# Supplementary material
Source: PubMed Central journal article supplement (PMC8224539)
Supplement: NIHMS1712870-supplement-Table_S1.pdf [file NIHMS1712870-supplement-Table_S1.pdf]

|         |         |         |           |         |        |         |         |          |
|---------|---------|---------|-----------|---------|--------|---------|---------|----------|
| ABL1    | BRIP1   | DICER1  | FGFR2     | IL7R    | MLH1   | PBRM1   | RAD54L  | SOX17    |
| AKT1    | BTK     | DIS3    | FGFR3     | INPP4A  | MLL    | PDCD1   | RAF1    | SOX2     |
| AKT2    | CARD11  | DNMT1   | FGFR4     | INPP4B  | MLL2   | PDGFRA  | RARA    | SOX9     |
| AKT3    | CASP8   | DNMT3A  | FH        | INSR    | MLL3   | PDGFRB  | RASA1   | SPEN     |
| ALK     | CBFB    | DNMT3B  | FLCN      | IRF4    | MPL    | PDPK1   | RB1     | SPOP     |
| ALOX12B | CBL     | DOT1L   | FLT1      | IRS1    | MRE11A | PHOX2B  | RBM10   | SRC      |
| APC     | CCND1   | E2F3    | FLT3      | IRS2    | MSH2   | PIK3C2G | RECQL4  | STAG2    |
| AR      | CCND2   | EED     | FLT4      | JAK1    | MSH6   | PIK3C3  | REL     | STK11    |
| ARAF    | CCND3   | EGFL7   | FOXA1     | JAK2    | MTOR   | PIK3CA  | RET     | STK40    |
| ARID1A  | CCNE1   | EGFR    | FOXL2     | JAK3    | MUTYH  | PIK3CB  | RFWD2   | SUFU     |
| ARID1B  | CD274   | EIF1AX  | FOXP1     | JUN     | MYC    | PIK3CD  | RHOA    | SUZ12    |
| ARID2   | CD276   | EP300   | FUBP1     | KDM5A   | MYCL1  | PIK3CG  | RICTOR  | SYK      |
| ARID5B  | CD79B   | EPCAM   | GATA1     | KDM5C   | MYCN   | PIK3R1  | RIT1    | TBX3     |
| ASXL1   | CDC73   | EPHA3   | GATA2     | KDM6A   | MYD88  | PIK3R2  | RNF43   | TERT     |
| ASXL2   | CDH1    | EPHA5   | GATA3     | KDR     | MYOD1  | PIK3R3  | ROS1    | TET1     |
| ATM     | CDK12   | EPHB1   | GNA11     | KEAP1   | NBN    | PIM1    | RPS6KA4 | TET2     |
| ATR     | CDK4    | ERBB2   | GNAQ      | KIT     | NCOR1  | PLK2    | RPS6KB2 | TGFBR1   |
| ATRX    | CDK6    | ERBB3   | GNAS      | KLF4    | NF1    | PMAIP1  | RPTOR   | TGFBR2   |
| AURKA   | CDK8    | ERBB4   | GREM1     | KRAS    | NF2    | PMS1    | RUNX1   | TMEM127  |
| AURKB   | CDKN1A  | ERCC2   | GRIN2A    | LATS1   | NFE2L2 | PMS2    | RYBP    | TMPRSS2  |
| AXIN1   | CDKN1B  | ERCC3   | GSK3B     | LATS2   | NKX2-1 | PNRC1   | SDHA    | TNFAIP3  |
| AXIN2   | CDKN2A  | ERCC4   | H3F3C     | LMO1    | NKX3-1 | POLE    | SDHAF2  | TNFRSF14 |
| AXL     | CDKN2B  | ERCC5   | HGF       | MAP2K1  | NOTCH1 | PPP2R1A | SDHB    | TOP1     |
| B2M     | CDKN2C  | ERG     | HIST1H1C  | MAP2K2  | NOTCH2 | PRDM1   | SDHC    | TP53     |
| BAP1    | CHEK1   | ESR1    | HIST1H2BD | MAP2K4  | NOTCH3 | PRKAR1A | SDHD    | TP63     |
| BARD1   | CHEK2   | ETV1    | HIST1H3B  | MAP3K1  | NOTCH4 | PTCH1   | SETD2   | TRAF7    |
| BBC3    | CIC     | ETV6    | HNF1A     | MAP3K13 | NPM1   | PTEN    | SF3B1   | TSC1     |
| BCL2    | CREBBP  | EZH2    | HRAS      | MAPK1   | NRAS   | PTPN11  | SH2D1A  | TSC2     |
| BCL2L1  | CRKL    | FAM123B | ICOSLG    | MAX     | NSD1   | PTPRD   | SHQ1    | TSHR     |
| BCL2L11 | CRLF2   | FAM175A | IDH1      | MCL1    | NTRK1  | PTPRS   | SMAD2   | U2AF1    |
| BCL6    | CSF1R   | FANCA   | IDH2      | MDC1    | NTRK2  | PTPRT   | SMAD3   | VHL      |
| BCOR    | CTCF    | FANCC   | IFNGR1    | MDM2    | NTRK3  | RAC1    | SMAD4   | VTCN1    |
| BLM     | CTLA4   | FAT1    | IGF1      | MDM4    | PAK1   | RAD50   | SMARCA4 | WT1      |
| BMPR1A  | CTNNB1  | FBXW7   | IGF1R     | MED12   | PAK7   | RAD51   | SMARCB1 | XIAP     |
| BRAF    | CUL3    | FGF19   | IGF2      | MEF2B   | PALB2  | RAD51B  | SMARCD1 | XPO1     |
| BRCA1   | DAXX    | FGF3    | IKBKE     | MEN1    | PARK2  | RAD51C  | SMO     | YAP1     |
| BRCA2   | DCUN1D1 | FGF4    | IKZF1     | MET     | PARP1  | RAD51D  | SOCS1   | YES1     |
| BRD4    | DDR2    | FGFR1   | IL10      | MITF    | PAX5   | RAD52   |         |          |

 [Export to Excel](#)
