# Supplementary material
Source: PubMed Central journal article supplement (PMC8224539)
Supplement: NIHMS1712870-supplement-Table_S2.pdf [file NIHMS1712870-supplement-Table_S2.pdf]

|         |         |         |           |         |        |         |         |          |
|---------|---------|---------|-----------|---------|--------|---------|---------|----------|
| ABL1    | CASP8   | DOT1L   | FOXA1     | IGF1R   | MET    | PARP1   | RAD51D  | SPOP     |
| ACVR1   | CBFB    | E2F3    | FOXL2     | IGF2    | MGA    | PAX5    | RAD52   | SRC      |
| AKT1    | CBL     | EED     | FOXO1     | IKBKE   | MITF   | PBRM1   | RAD54L  | SRSF2    |
| AKT2    | CCND1   | EGFL7   | FOXP1     | IKZF1   | MLH1   | PDCD1   | RAF1    | STAG2    |
| AKT3    | CCND2   | EGFR    | FUBP1     | IL10    | MLL    | PDGFRA  | RARA    | STAT3    |
| ALK     | CCND3   | EIF1AX  | FYN       | IL7R    | MLL2   | PDGFRB  | RASA1   | STAT5A   |
| ALOX12B | CCNE1   | EIF4A2  | GATA1     | INHA    | MLL3   | PDPK1   | RB1     | STAT5B   |
| ANKRD11 | CD274   | EIF4E   | GATA2     | INHBA   | MPL    | PGR     | RBM10   | STK11    |
| APC     | CD276   | EP300   | GATA3     | INPP4A  | MRE11A | PHOX2B  | RECQL4  | STK40    |
| AR      | CD79A   | EPCAM   | GLI1      | INPP4B  | MSH2   | PIK3C2G | REL     | SUFU     |
| ARAF    | CD79B   | EPHA3   | GNA11     | INSR    | MSH6   | PIK3C3  | RET     | SUZ12    |
| ARID1A  | CDC73   | EPHA5   | GNAQ      | IRF4    | MST1   | PIK3CA  | RFWD2   | SYK      |
| ARID1B  | CDH1    | EPHA7   | GNAS      | IRS1    | MST1R  | PIK3CB  | RHEB    | TBX3     |
| ARID2   | CDK12   | EPHB1   | GPS2      | IRS2    | MTOR   | PIK3CD  | RHOA    | TCEB1    |
| ARID5B  | CDK4    | ERBB2   | GREM1     | JAK1    | MUTYH  | PIK3CG  | RICTOR  | TCF3     |
| ASXL1   | CDK6    | ERBB3   | GRIN2A    | JAK2    | MYC    | PIK3R1  | RIT1    | TCF7L2   |
| ASXL2   | CDK8    | ERBB4   | GSK3B     | JAK3    | MYCL1  | PIK3R2  | RNF43   | TERT     |
| ATM     | CDKN1A  | ERCC2   | H3F3A     | JUN     | MYCN   | PIK3R3  | ROS1    | TET1     |
| ATR     | CDKN1B  | ERCC3   | H3F3B     | KDM5A   | MYD88  | PIM1    | RPS6KA4 | TET2     |
| ATRX    | CDKN2A  | ERCC4   | H3F3C     | KDM5C   | MYOD1  | PLCG2   | RPS6KB2 | TGFBR1   |
| AURKA   | CDKN2B  | ERCC5   | HGF       | KDM6A   | NBN    | PLK2    | RPTOR   | TGFBR2   |
| AURKB   | CDKN2C  | ERG     | HIST1H1C  | KDR     | NCOA3  | PMAIP1  | RUNX1   | TMEM127  |
| AXIN1   | CEBPA   | ERRF1   | HIST1H2BD | KEAP1   | NCOR1  | PMS1    | RYBP    | TMPRSS2  |
| AXIN2   | CENPA   | ESR1    | HIST1H3A  | KIT     | NEGR1  | PMS2    | SDHA    | TNFAIP3  |
| AXL     | CHEK1   | ETV1    | HIST1H3B  | KLF4    | NF1    | PNRC1   | SDHAF2  | TNFRSF14 |
| B2M     | CHEK2   | ETV6    | HIST1H3C  | KRAS    | NF2    | POLD1   | SDHB    | TOP1     |
| BAP1    | CIC     | EZH2    | HIST1H3D  | LATS1   | NFE2L2 | POLE    | SDHC    | TP53     |
| BARD1   | CREBBP  | FAM123B | HIST1H3E  | LATS2   | NFKBIA | PPM1D   | SDHD    | TP63     |
| BBC3    | CRKL    | FAM175A | HIST1H3F  | LMO1    | NKX2-1 | PPP2R1A | SETD2   | TRAF2    |
| BCL10   | CRLF2   | FAM46C  | HIST1H3G  | MALT1   | NKX3-1 | PPP6C   | SF3B1   | TRAF7    |
| BCL2    | CSF1R   | FANCA   | HIST1H3H  | MAP2K1  | NOTCH1 | PRDM1   | SH2B3   | TSC1     |
| BCL2L1  | CSF3R   | FANCC   | HIST1H3I  | MAP2K2  | NOTCH2 | PRKAR1A | SH2D1A  | TSC2     |
| BCL2L11 | CTCF    | FAT1    | HIST1H3J  | MAP2K4  | NOTCH3 | PTCH1   | SHQ1    | TSHR     |
| BCL6    | CTLA4   | FBXW7   | HIST2H3C  | MAP3K1  | NOTCH4 | PTEN    | SMAD2   | U2AF1    |
| BCOR    | CTNNB1  | FGF19   | HIST2H3D  | MAP3K13 | NPM1   | PTPN11  | SMAD3   | VEGFA    |
| BIRC3   | CUL3    | FGF3    | HIST3H3   | MAP3K14 | NRAS   | PTPRD   | SMAD4   | VHL      |
| BLM     | CXCR4   | FGF4    | HLA-A     | MAPK1   | NSD1   | PTPRS   | SMARCA4 | VTCN1    |
| BMPR1A  | DAXX    | FGFR1   | HNF1A     | MAPK3   | NTRK1  | PTPRT   | SMARCB1 | WT1      |
| BRAF    | DCUN1D1 | FGFR2   | HOXB13    | MAX     | NTRK2  | RAB35   | SMARCD1 | XIAP     |
| BRCA1   | DDR2    | FGFR3   | HRAS      | MCL1    | NTRK3  | RAC1    | SMO     | XPO1     |
| BRCA2   | DICER1  | FGFR4   | ICOSLG    | MDC1    | NUP93  | RAD21   | SOCS1   | XRCC2    |
| BRD4    | DIS3    | FH      | ID3       | MDM2    | PAK1   | RAD50   | SOX17   | YAP1     |
| BRIP1   | DNAJB1  | FLCN    | IDH1      | MDM4    | PAK7   | RAD51   | SOX2    | YES1     |
| BTK     | DNMT1   | FLT1    | IDH2      | MED12   | PALB2  | RAD51B  | SOX9    | ZFH3     |
| CALR    | DNMT3A  | FLT3    | IFNGR1    | MEF2B   | PARK2  | RAD51C  | SPEN    | ZRSR2    |
| CARD11  | DNMT3B  | FLT4    | IGF1      | MEN1    |        |         |         |          |

 Export to Excel
